# Supplementary material
Source: ML conference proceedings conference paper supplement (https://openaccess.thecvf.com/content/ICCV2023/html/Jiang_AvatarCraft_Transforming_Text_ICCV_2023_paper.html)
Supplement: Supplementary file 1 [file Jiang_AvatarCraft_Transforming_Text_ICCV_2023_supplemental.pdf]

# Supplementary Material of AvatarCraft: Transforming Text into Neural Human Avatars with Parameterized Shape and Pose Control

## 1. More Implementation Details

We adopt similar augmentation strategies to those used in recent text-to-3D generative models [1, 5, 3, 2, 4]. In this section, we describe the adopted augmentations in detail.

**Random Camera Extrinsic Augmentation.** During the template avatar creation process, we randomize the camera extrinsic when rendering the implicit avatar  $\mathcal{N}$ . More specifically, we fix the camera to look at the center and sample elevation angle  $\theta \sim \mathcal{U}(-\pi/6, \pi/6)$ , azimuth angle  $\phi \sim \mathcal{U}((-\pi/3, \pi/3) \cup (2\pi/3, 4\pi/3))$ , and camera distance in  $\mathcal{U}(2.0, 2.2)$ .

**Random Background Augmentation.** We augment the rendering of implicit avatar  $\mathcal{N}$  by using random background color. Three types of background are used, including 1) pure white. 2) pure black. 3) Gaussian noise  $\mathcal{N}(0.5, 0.1)$ .

**View-dependent Prompt Augmentation.** We combine the prompt augmentation technique for human [1] and for general object [5] to provide more semantically meaningful text guidance. First, we use “*the body of {}*” and “*the face of {}*” when rendering body and head bounding box of avatars, respectively. Additionally, we further augment the prompt by “*front view of {}*”, “*side view of {}*” depending on the range of azimuth angle  $\phi$ . More specifically, we use “*Front view of {}*” when  $5\pi/6 \leq \phi \leq 7\pi/6$ , and use “*Back view of {}*” when  $-\pi/6 \leq \phi \leq \pi/6$ , otherwise we use “*Side view of {}*”. Putting it together, example prompts include “back view of the body of Captain America” and “front view of the head of Captain America”. We visualize our augmentation in Fig. 1.

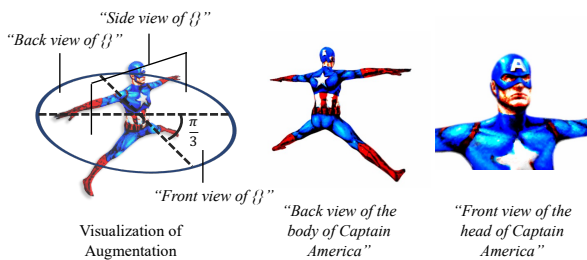

## 2. Additional Qualitative Results

In this section, we provide more results of our proposed method, including additional generated avatars in Fig. 2 and Fig. 3, as well as pose sequences in Fig. 4.

## 3. Supplementary Video

We provide a supplementary video with more visual results rendered in multiple views. We highly recommend watching our supplementary video in <https://avatar-craft.github.io/> to observe the user-friendliness and view consistency that our method can achieve in creating, reshaping, and animating neural human avatars.

## References

- [1] Fangzhou Hong, Mingyuan Zhang, Liang Pan, Zhongang Cai, Lei Yang, and Ziwei Liu. Avatarclip: Zero-shot text-driven generation and animation of 3d avatars. *arXiv preprint arXiv:2205.08535*, 2022. 1
- [2] Ajay Jain, Ben Mildenhall, Jonathan T Barron, Pieter Abbeel, and Ben Poole. Zero-shot text-guided object generation with dream fields. In *Proceedings of the IEEE/CVF Conference on Computer Vision and Pattern Recognition*, pages 867–876, 2022. 1
- [3] Han-Hung Lee and Angel X Chang. Understanding pure clip guidance for voxel grid nerf models. *arXiv preprint arXiv:2209.15172*, 2022. 1
- [4] Chen-Hsuan Lin, Jun Gao, Luming Tang, Towaki Takikawa, Xiaohui Zeng, Xun Huang, Karsten Kreis, Sanja Fidler, Ming-Yu Liu, and Tsung-Yi Lin. Magic3d: High-resolution text-to-3d content creation. *arXiv preprint arXiv:2211.10440*, 2022. 1
- [5] Ben Poole, Ajay Jain, Jonathan T Barron, and Ben Mildenhall. Dreamfusion: Text-to-3d using 2d diffusion. *arXiv preprint arXiv:2209.14988*, 2022. 1

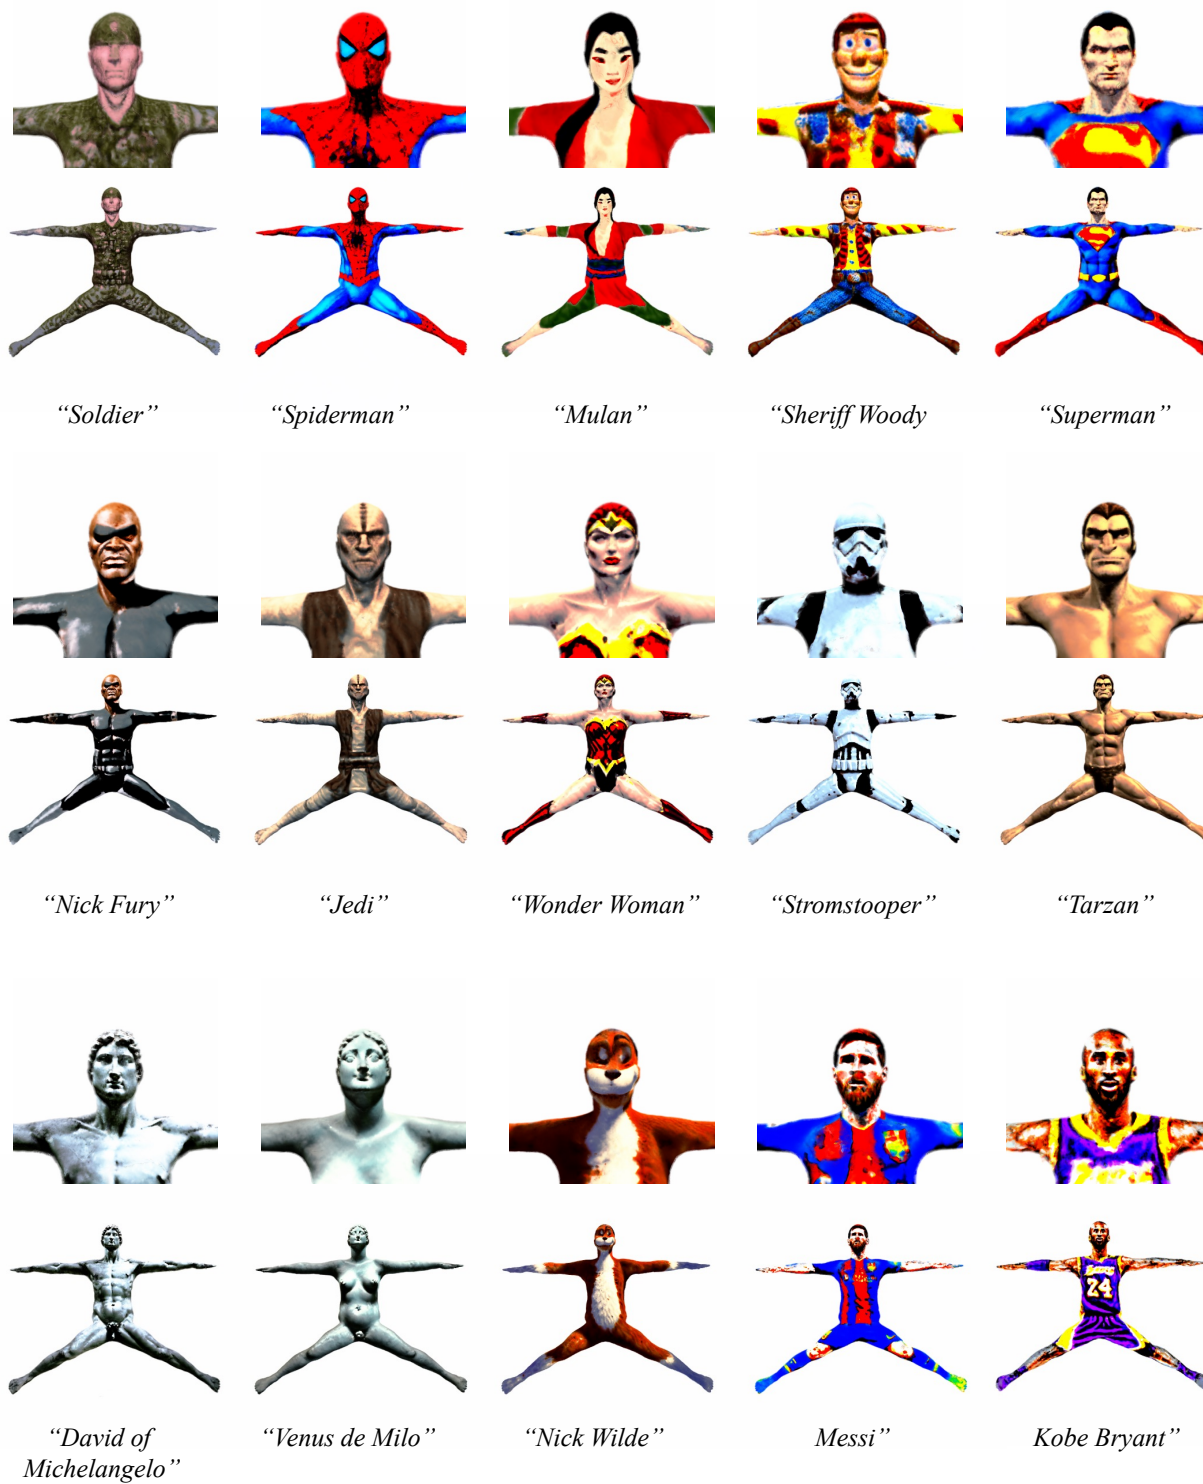

Figure 2. More Generated Avatars.

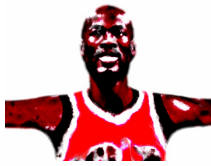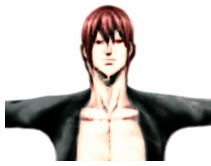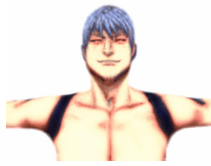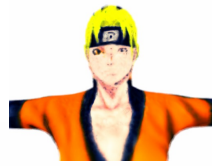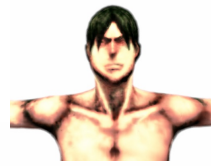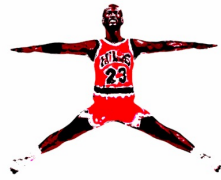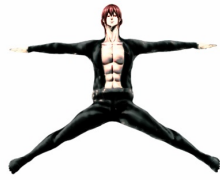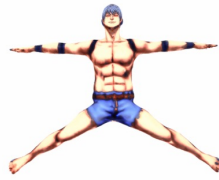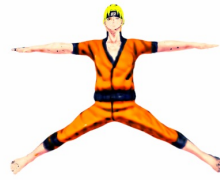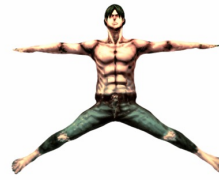

*“Michael Jordan”*

*“Iroi Yagami”*

*“Gintoki”*

*“Naruto Uzumaki”*

*“Eren Yeager”*

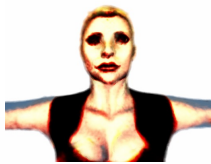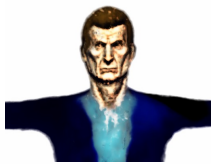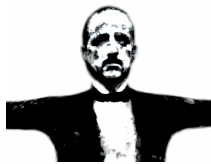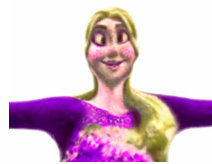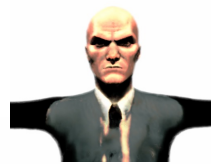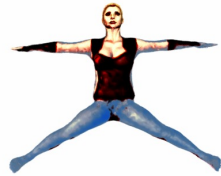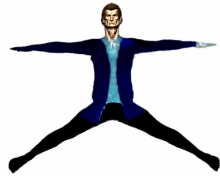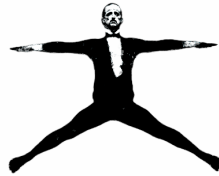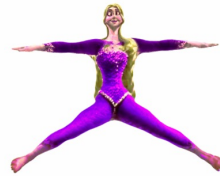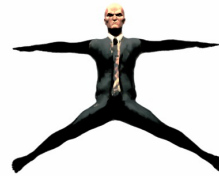

*“Buffy the Vampire Slayer”*

*“Doctor Who”*

*“The Godfather”*

*“Rapunzel in Tangled”*

*“Agent 47”*

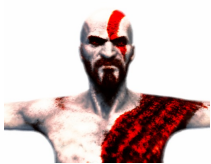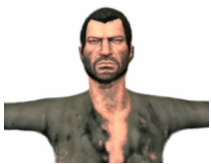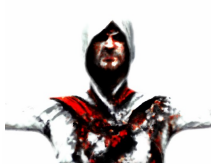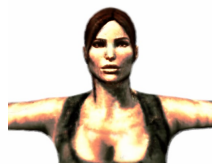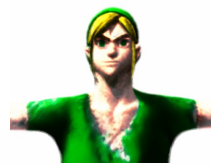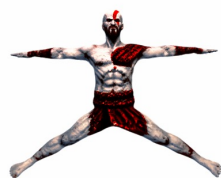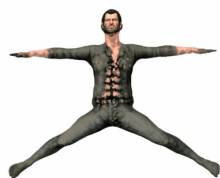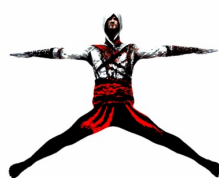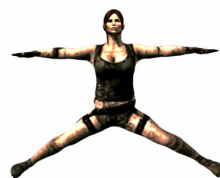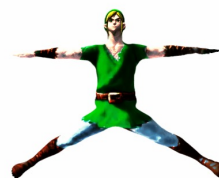

*“Kratos”*

*“Jack Marston”*

*“Assassin's Creed”*

*“Lara Croft in Tomb Raider”*

*“Link in Zelda”*

**Figure 3. More Generated Avatars.**

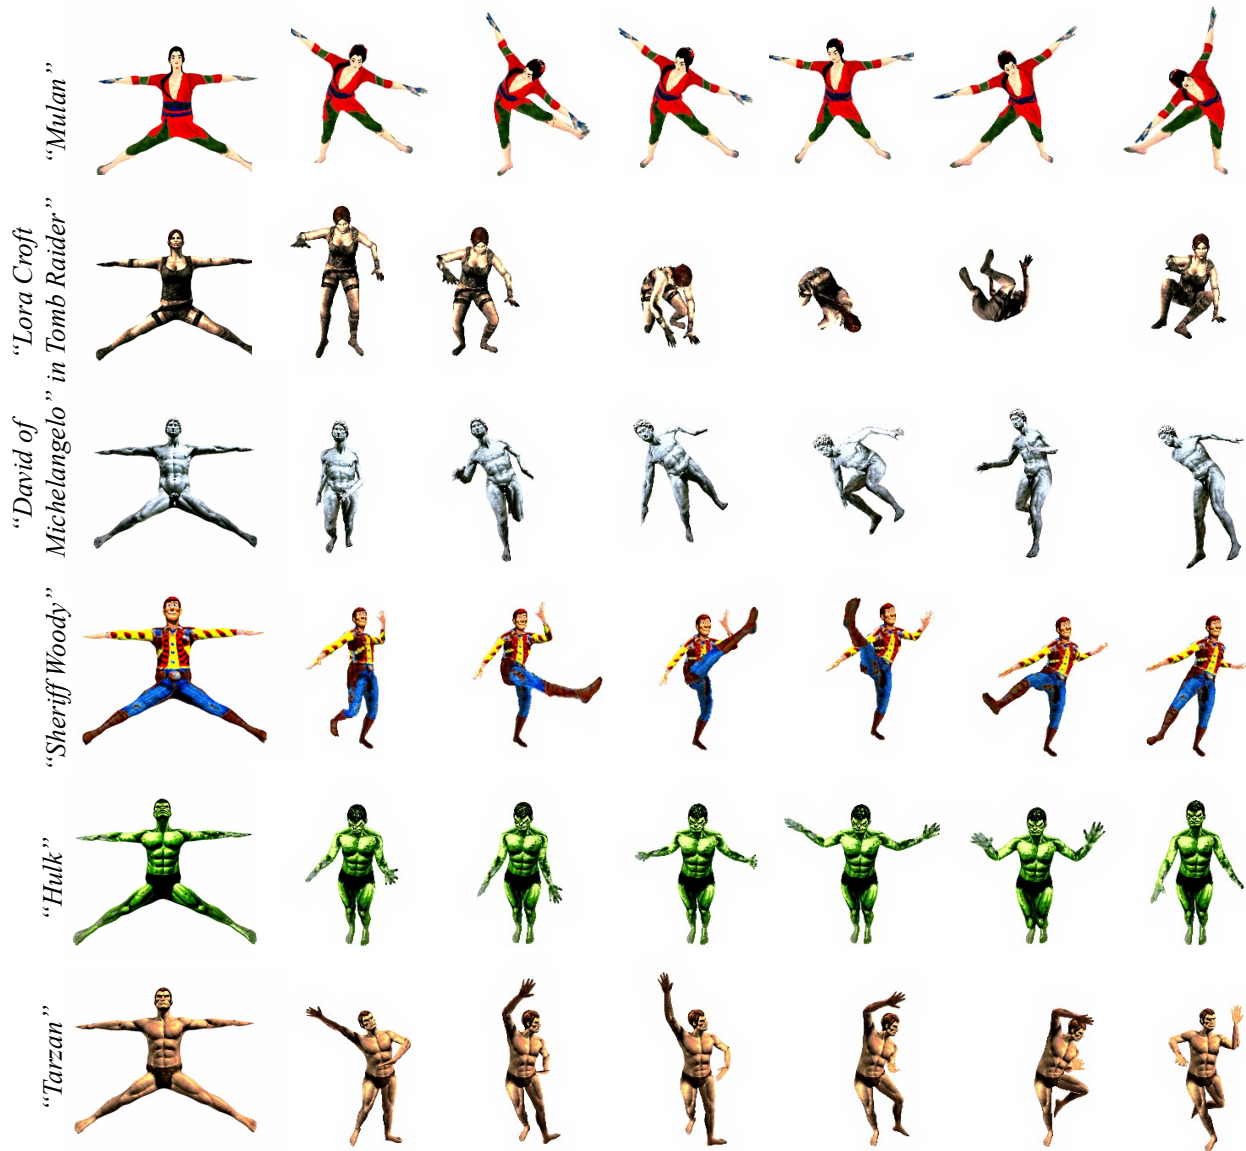

Figure 4. Pose Sequences.
